# Supplementary material
Source: publisher site journal article supplement (https://www.spandidos-publications.com/4028/downloadSupplementary)
Supplement: Supplementary file 1 [file downloadSupplementary]

Figure S1. Knockdown of WBSCR22 enhances the proliferation and invasion of BXPC-3 cells. (A) Proliferation assay of the BXPC-3 cells expressing shWBSCR22 and shCtrl. The data were analyzed using a two-way ANOVA, followed by Bonferroni corrections. (B) Transwell assays of the BXPC-3 cells expressing shWBSCR22 and shCtrl. The data were analyzed using a two-tailed, unpaired t-test. P-values are indicated. The data are presented as the mean value  $\pm$  standard deviation; n=3 biologically independent repeats. WBSCR22, Williams-Beuren syndrome chromosomal region 22; sh, small hairpin.

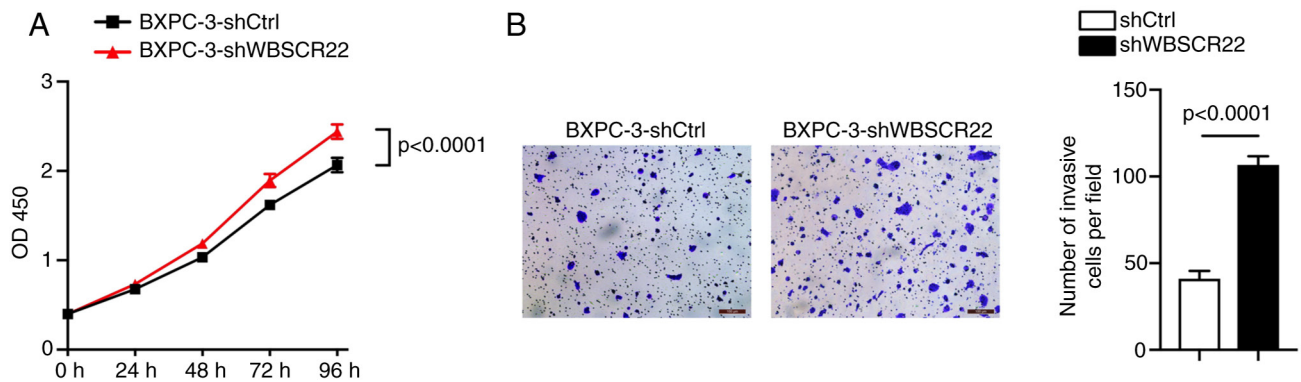

Figure S2. ISG15 overexpression partially rescues the tumor-inhibiting capacity of WBSCR22-OE + TRMT112-OE cells. (A and B) ISG15 overexpression rescued the inhibition of cell (A) proliferation and (B) invasion caused by synergistically over-expressed WBSCR22 and TRMT112. The data are presented as the mean value  $\pm$  standard deviation;  $n=3$  biologically independent repeats. The data in A were analyzed using a two-way ANOVA, followed by Bonferroni corrections. The data in B were analyzed using a two-tailed, unpaired t-test. P-values are indicated. ISG15, interferon-stimulated gene 15; WBSCR22, Williams-Beuren syndrome chromosomal region 22; OE, overexpression; TRMT112, tRNA methyltransferase activator subunit 11-2.

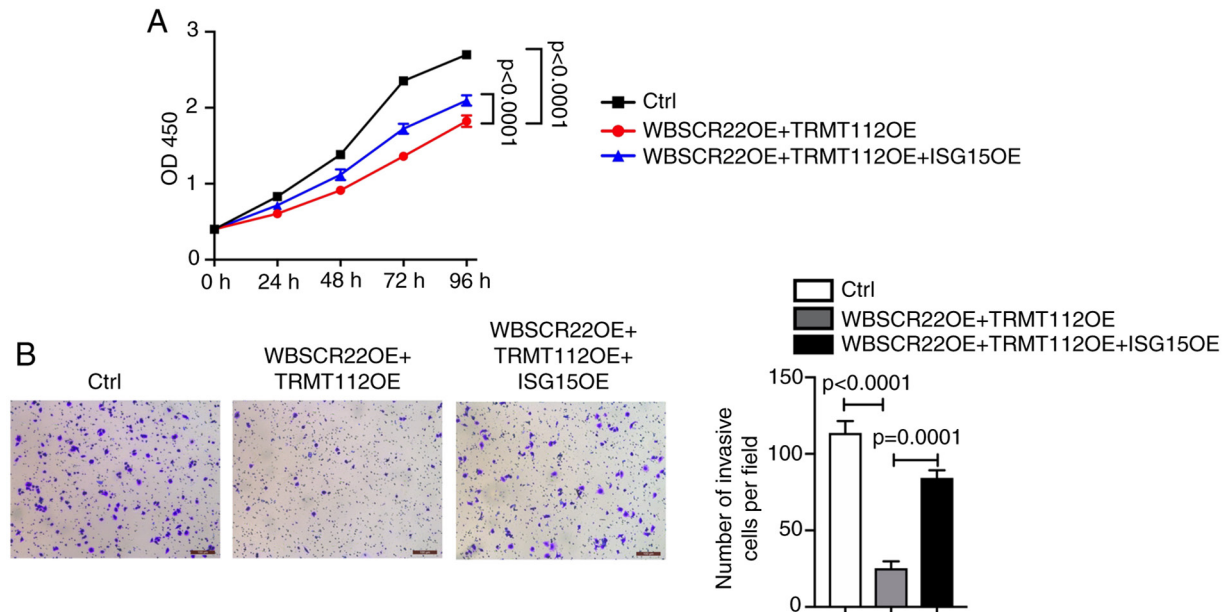

Table SI. STR authentication of cell lines.

| Cells  | D5S818 | D13S317 | D7S820 | D16S539 | vWA   | TH01  | AM   | TPOX | CSF1PO |
|--------|--------|---------|--------|---------|-------|-------|------|------|--------|
| HPDE6  | 10,12  | 11,12   | 9,10   | 11,13   | 14,17 | 9,3   | X, X | 8,10 | 11,12  |
| PANC-1 | 11,13  | 11,11   | 8,10   | 11,11   | 15,15 | 7,8   | X, X | 8,11 | 10,12  |
| AsPC-1 | 12,12  | 9,12    | 12,13  | 11,11   | 17,17 | 7,9,3 | X, X | 8,10 | 10,13  |
| BxPC-3 | 12,12  | 11,11   | 10,13  | 9,11    | 14,18 | 9,9   | X, X | 8,8  | 13,13  |

All cell lines used in the present study have been previously authenticated, stored and confirmed at the beginning of the current study by RADIL [Research Animal Diagnostic Laboratory (Columbia, USA)/Chinese Academy of Sciences (CAS), China] by species-specific PCR evaluation.
